# Supplementary material for: Origin, evolution, and distribution of the molecular machinery for biosynthesis of sialylated lipooligosaccharide structures in Campylobacter coli
Source: PubMed Central journal article supplement (PMC5813019; doi:10.1038/s41598-018-21438-2), 2018-02-14
Supplement: 41598_2018_21438_MOESM1_ESM.pdf [file 41598_2018_21438_MOESM1_ESM.pdf]

Supplementary Table 1

| Accession Number NCBI | CstI (Uniprot Q9RGF1) |             |       | CstII (Uniprot Q9F0M9) |             |       | CstIII (Uniprot Q7BP25) |             |       | Blastp BSR Groups       |
|-----------------------|-----------------------|-------------|-------|------------------------|-------------|-------|-------------------------|-------------|-------|-------------------------|
|                       | Max score             | Query cover | Ident | Max score              | Query cover | Ident | Max score               | Query cover | Ident |                         |
| WP_075499791.1        | 594                   | 93%         | 71%   | 257                    | 88%         | 51%   | 241                     | 82%         | 50%   | Group 1                 |
| WP_075479633.1        | 601                   | 93%         | 72%   | 262                    | 88%         | 52%   | 239                     | 82%         | 51%   | Group 1                 |
| WP_020974326.1        | 563                   | 93%         | 62%   | 261                    | 92%         | 50%   | 236                     | 88%         | 49%   | Group 1                 |
| WP_078397546.1        | 591                   | 93%         | 71%   | 259                    | 88%         | 51%   | 236                     | 82%         | 50%   | Group 1                 |
| WP_078397196.1        | 597                   | 93%         | 71%   | 259                    | 88%         | 51%   | 236                     | 82%         | 50%   | Group 1                 |
| WP_075438134.1        | 603                   | 93%         | 73%   | 258                    | 88%         | 50%   | 240                     | 82%         | 51%   | Group 1                 |
| WP_075462360.1        | 594                   | 93%         | 71%   | 257                    | 88%         | 51%   | 241                     | 82%         | 50%   | Group 1                 |
| WP_038854372.1        | 603                   | 93%         | 72%   | 256                    | 92%         | 50%   | 244                     | 88%         | 49%   | Group 1                 |
| WP_075429285.1        | 592                   | 93%         | 70%   | 254                    | 88%         | 50%   | 238                     | 82%         | 51%   | Group 1                 |
| WP_075480439.1        | 584                   | 93%         | 69%   | 254                    | 88%         | 50%   | 238                     | 82%         | 51%   | Group 1                 |
| WP_075447657.1        | 248                   | 56%         | 54%   | 275                    | 98%         | 50%   | 471                     | 100%        | 76%   | Group 2                 |
| WP_002858290.1        | -                     | -           | -     | 291                    | 98%         | 53%   | 592                     | 100%        | 100%  | Group 2                 |
| WP_079755069.1        | 265                   | 61%         | 51%   | 272                    | 90%         | 52%   | 256                     | 86%         | 53%   | Group 3                 |
| WP_002878823.1        | 274                   | 59%         | 54%   | 588                    | 100%        | 100%  | 291                     | 95%         | 53%   | Group 4                 |
| AHK77095.1            | 268                   | 59%         | 53%   | 537                    | 100%        | 90%   | 289                     | 95%         | 53%   | Group 4                 |
| WP_057044593.1        | 271                   | 59%         | 55%   | 528                    | 100%        | 89%   | 292                     | 95%         | 53%   | Group 4                 |
| WP_075456236.1        | 258                   | 62%         | 52%   | 509                    | 98%         | 87%   | 292                     | 95%         | 51%   | Group 4                 |
| WP_032685951.1        | 260                   | 62%         | 52%   | 508                    | 98%         | 86%   | 294                     | 97%         | 51%   | Group 4                 |
| WP_072226922.1        | 260                   | 62%         | 52%   | 507                    | 98%         | 87%   | 288                     | 95%         | 51%   | Group 4                 |
| WP_075485758.1        | 248                   | 62%         | 49%   | 499                    | 99%         | 85%   | 289                     | 95%         | 52%   | Group 4                 |
| WP_075499417.1        | -                     | -           | -     | 241                    | 98%         | 49%   | 202                     | 97%         | 44%   | Group 5                 |
| WP_020974593.1        | -                     | -           | -     | 241                    | 98%         | 48%   | 201                     | 97%         | 44%   | Group 5                 |
| WP_075444400.1        | -                     | -           | -     | 241                    | 98%         | 48%   | 201                     | 97%         | 44%   | Group 5                 |
| WP_075481154.1        | -                     | -           | -     | 239                    | 98%         | 48%   | 200                     | 97%         | 43%   | Group 5                 |
| WP_075484527.1        | -                     | -           | -     | 239                    | 98%         | 48%   | 199                     | 97%         | 43%   | Group 5                 |
| WP_075462815.1        | -                     | -           | -     | 238                    | 98%         | 48%   | 200                     | 97%         | 43%   | Group 5                 |
| WP_075440629.1        | -                     | -           | -     | 238                    | 98%         | 48%   | 200                     | 97%         | 43%   | Group 5                 |
| WP_075470126.1        | -                     | -           | -     | 238                    | 98%         | 48%   | 201                     | 97%         | 43%   | Group 5                 |
| WP_075489678.1        | -                     | -           | -     | 180                    | 99%         | 37%   | 155                     | 97%         | 36%   | Group 6                 |
| WP_075437196.1        | -                     | -           | -     | 177                    | 99%         | 38%   | 149                     | 97%         | 35%   | Group 6                 |
| WP_075480001.1        | -                     | -           | -     | 162                    | 95%         | 36%   | 139                     | 93%         | 35%   | Group 6                 |
| OOX95181.1            | -                     | -           | -     | 202                    | 97%         | 42%   | 164                     | 94%         | 39%   | Group 7                 |
| WP_075450901.1        | -                     | -           | -     | 197                    | 97%         | 41%   | 154                     | 94%         | 36%   | Group 7                 |
| WP_078397125.1        | -                     | -           | -     | 196                    | 97%         | 41%   | 154                     | 94%         | 36%   | Group 7                 |
| WP_075490494.1        | -                     | -           | -     | 194                    | 97%         | 41%   | 155                     | 94%         | 37%   | Group 7                 |
| WP_075431764.1        | -                     | -           | -     | 194                    | 97%         | 40%   | 156                     | 94%         | 38%   | Group 7                 |
| WP_002822516.1        | -                     | -           | -     | 190                    | 98%         | 39%   | 156                     | 94%         | 36%   | Group 7                 |
| WP_002780628.1        | -                     | -           | -     | 190                    | 98%         | 39%   | 155                     | 94%         | 36%   | Group 7                 |
| WP_053875543.1        | -                     | -           | -     | 189                    | 98%         | 39%   | 154                     | 94%         | 36%   | Group 7                 |
| WP_075480516.1        | 445                   | 66%         | 74%   | 266                    | 92%         | 50%   | 229                     | 88%         | 47%   | <i>partial sequence</i> |
| WP_075503029.1        | 476                   | 74%         | 71%   | 267                    | 92%         | 51%   | 238                     | 88%         | 49%   | <i>partial sequence</i> |
| WP_075450515.1        | 439                   | 66%         | 74%   | 255                    | 88%         | 50%   | 236                     | 85%         | 49%   | <i>partial sequence</i> |
| WP_075450156.1        | 436                   | 70%         | 70%   | 254                    | 88%         | 50%   | 237                     | 82%         | 50%   | <i>partial sequence</i> |
| WP_075460213.1        | 427                   | 66%         | 72%   | 252                    | 92%         | 50%   | 244                     | 88%         | 49%   | <i>partial sequence</i> |
| WP_053877509.1        | -                     | -           | -     | 110                    | 79%         | 32%   | -                       | -           | -     | <i>partial sequence</i> |
