# Supplementary material for: Origin, evolution, and distribution of the molecular machinery for biosynthesis of sialylated lipooligosaccharide structures in Campylobacter coli
Source: PubMed Central journal article supplement (PMC5813019; doi:10.1038/s41598-018-21438-2), 2018-02-14
Supplement: 41598_2018_21438_MOESM2_ESM.pdf [file 41598_2018_21438_MOESM2_ESM.pdf]

lementary Table 4

| Sequence   | LOS classes |     |     |    |    |     |      |    |    |    |     |           | Cluster A GT-42 |             |            |           | Cluster B GT-42 |            |   | NeuB | Clade |
|------------|-------------|-----|-----|----|----|-----|------|----|----|----|-----|-----------|-----------------|-------------|------------|-----------|-----------------|------------|---|------|-------|
|            | I           | II  | III | IV | VI | VII | VIII | IX | X  | XI | XII | cstI (G1) | cstIII (G2)     | cstVII (G3) | cstII (G4) | cstV (G5) | cstVI (G6)      | cstIV (G7) |   |      |       |
| ERR083880  | 0           | 0   | 100 | 0  | 0  | 6   | 0    | 0  | 23 | 17 | 0   | 0         | 0               | 0           | 0          | 1         | 0               | 0          | 0 | 1    |       |
| ERR083884  | 0           | 0   | 100 | 0  | 0  | 6   | 6    | 0  | 23 | 17 | 0   | 0         | 0               | 0           | 0          | 1         | 0               | 0          | 0 | 1    |       |
| ERR083912  | 14          | 0   | 9   | 0  | 0  | 0   | 94   | 38 | 0  | 8  | 0   | 0         | 0               | 1           | 0          | 0         | 0               | 1          | 1 |      |       |
| ERR083913  | 0           | 0   | 100 | 0  | 0  | 6   | 6    | 0  | 23 | 17 | 0   | 0         | 0               | 0           | 0          | 1         | 0               | 0          | 0 | 1    |       |
| ERR083924  | 0           | 0   | 100 | 0  | 0  | 6   | 6    | 0  | 23 | 17 | 0   | 0         | 0               | 0           | 0          | 1         | 0               | 0          | 0 | 1    |       |
| ERR083928  | 0           | 0   | 100 | 0  | 7  | 6   | 6    | 0  | 23 | 17 | 0   | 0         | 0               | 0           | 0          | 1         | 0               | 0          | 0 | 1    |       |
| ERR083953  | 0           | 0   | 100 | 0  | 0  | 6   | 6    | 0  | 23 | 17 | 0   | 0         | 0               | 0           | 0          | 1         | 0               | 0          | 0 | 1    |       |
| ERR083996  | 0           | 0   | 100 | 0  | 0  | 6   | 0    | 0  | 15 | 0  | 0   | 0         | 0               | 0           | 0          | 1         | 0               | 0          | 0 | 1    |       |
| ERR084002  | 0           | 92  | 0   | 0  | 0  | 0   | 0    | 0  | 0  | 0  | 0   | 0         | 0               | 0           | 0          | 0         | 1               | 0          | 0 | 1    |       |
| ERR084011  | 14          | 0   | 0   | 0  | 0  | 0   | 6    | 0  | 0  | 0  | 0   | 0         | 0               | 1           | 0          | 0         | 0               | 1          | 1 |      |       |
| ERR084042  | 0           | 0   | 91  | 0  | 0  | 6   | 6    | 0  | 23 | 8  | 0   | 0         | 0               | 0           | 0          | 1         | 0               | 0          | 0 | 1    |       |
| ERR084055  | 0           | 88  | 0   | 0  | 0  | 0   | 6    | 0  | 0  | 0  | 0   | 0         | 0               | 0           | 0          | 0         | 1               | 0          | 0 | 1    |       |
| ERR084056  | 0           | 92  | 0   | 0  | 0  | 0   | 6    | 0  | 0  | 0  | 0   | 0         | 0               | 0           | 0          | 0         | 1               | 0          | 0 | 1    |       |
| ERR084059  | 0           | 0   | 91  | 0  | 0  | 6   | 6    | 0  | 23 | 17 | 0   | 0         | 0               | 0           | 0          | 1         | 0               | 0          | 0 | 1    |       |
| ERR084071  | 0           | 100 | 0   | 0  | 0  | 0   | 6    | 0  | 0  | 0  | 0   | 0         | 0               | 0           | 0          | 0         | 1               | 0          | 0 | 1    |       |
| ERR084082  | 0           | 0   | 100 | 0  | 0  | 6   | 6    | 0  | 23 | 8  | 0   | 0         | 0               | 0           | 0          | 1         | 0               | 0          | 0 | 1    |       |
| ERR084083  | 0           | 0   | 91  | 0  | 0  | 6   | 6    | 0  | 23 | 8  | 0   | 0         | 0               | 0           | 0          | 1         | 0               | 0          | 0 | 1    |       |
| ERR084085  | 0           | 0   | 100 | 0  | 0  | 6   | 6    | 0  | 23 | 17 | 0   | 0         | 0               | 0           | 0          | 1         | 0               | 0          | 0 | 1    |       |
| ERR084115  | 0           | 0   | 91  | 0  | 0  | 6   | 6    | 0  | 23 | 8  | 0   | 0         | 0               | 0           | 0          | 1         | 0               | 0          | 0 | 1    |       |
| ERR084124  | 0           | 0   | 100 | 0  | 0  | 6   | 6    | 0  | 23 | 17 | 0   | 0         | 0               | 0           | 0          | 1         | 0               | 0          | 0 | 1    |       |
| ERR084134  | 0           | 100 | 0   | 0  | 0  | 0   | 6    | 0  | 0  | 0  | 0   | 0         | 0               | 0           | 0          | 0         | 1               | 0          | 0 | 1    |       |
| ERR084148  | 0           | 100 | 0   | 0  | 0  | 0   | 6    | 0  | 0  | 0  | 0   | 0         | 0               | 0           | 0          | 0         | 1               | 0          | 0 | 1    |       |
| ERR108323  | 0           | 100 | 0   | 0  | 0  | 0   | 6    | 0  | 0  | 0  | 0   | 0         | 0               | 0           | 0          | 0         | 1               | 0          | 0 | 1    |       |
| ERR1147218 | 0           | 92  | 0   | 0  | 0  | 0   | 6    | 0  | 0  | 0  | 0   | 0         | 0               | 0           | 0          | 0         | 1               | 0          | 0 | 1    |       |
| ERR1147219 | 0           | 88  | 0   | 0  | 0  | 0   | 6    | 0  | 0  | 0  | 0   | 0         | 0               | 0           | 0          | 0         | 1               | 0          | 0 | 1    |       |
| ERR1163389 | 0           | 0   | 91  | 0  | 0  | 6   | 0    | 0  | 23 | 8  | 0   | 0         | 0               | 0           | 0          | 1         | 0               | 0          | 0 | 1    |       |
| ERR1163390 | 0           | 0   | 91  | 0  | 0  | 6   | 0    | 0  | 15 | 8  | 0   | 0         | 0               | 0           | 0          | 1         | 0               | 0          | 0 | 1    |       |
| ERR1163391 | 0           | 0   | 91  | 0  | 0  | 6   | 0    | 0  | 23 | 8  | 0   | 0         | 0               | 0           | 0          | 1         | 0               | 0          | 0 | 1    |       |
| ERR1163392 | 0           | 96  | 0   | 0  | 0  | 0   | 6    | 0  | 0  | 0  | 0   | 0         | 0               | 0           | 0          | 0         | 1               | 0          | 0 | 1    |       |
| ERR1163393 | 0           | 8   | 9   | 0  | 0  | 6   | 0    | 38 | 0  | 0  | 0   | 0         | 0               | 1           | 0          | 0         | 0               | 1          | 1 |      |       |
| ERR1163397 | 0           | 0   | 91  | 0  | 0  | 6   | 0    | 0  | 15 | 8  | 0   | 0         | 0               | 0           | 0          | 1         | 0               | 0          | 0 | 1    |       |
| ERR1163398 | 0           | 0   | 91  | 0  | 0  | 6   | 0    | 0  | 23 | 8  | 0   | 0         | 0               | 0           | 0          | 1         | 0               | 0          | 0 | 1    |       |
| ERR1163399 | 0           | 0   | 91  | 0  | 0  | 6   | 0    | 0  | 23 | 8  | 0   | 0         | 0               | 0           | 0          | 1         | 0               | 0          | 0 | 1    |       |
| ERR1163400 | 0           | 0   | 100 | 0  | 0  | 6   | 0    | 0  | 23 | 8  | 0   | 0         | 0               | 0           | 0          | 1         | 0               | 0          | 0 | 1    |       |
| ERR1163401 | 0           | 0   | 100 | 0  | 0  | 6   | 0    | 0  | 23 | 8  | 0   | 0         | 0               | 0           | 0          | 1         | 0               | 0          | 0 | 1    |       |
| ERR1163403 | 0           | 0   | 91  | 0  | 0  | 6   | 6    | 0  | 15 | 8  | 0   | 0         | 0               | 0           | 0          | 1         | 0               | 0          | 0 | 1    |       |
| ERR1163404 | 0           | 0   | 100 | 0  | 0  | 6   | 0    | 0  | 15 | 17 | 0   | 0         | 0               | 0           | 0          | 1         | 0               | 0          | 0 | 1    |       |
| ERR1163405 | 0           | 0   | 91  | 0  | 0  | 6   | 6    | 0  | 23 | 8  | 0   | 0         | 0               | 0           | 0          | 1         | 0               | 0          | 0 | 1    |       |
| ERR1163406 | 0           | 0   | 100 | 0  | 0  | 6   | 0    | 0  | 23 | 8  | 0   | 0         | 0               | 0           | 0          | 1         | 0               | 0          | 0 | 1    |       |
| ERR1163407 | 0           | 0   | 91  | 0  | 0  | 6   | 0    | 0  | 23 | 8  | 0   | 0         | 0               | 0           | 0          | 1         | 0               | 0          | 0 | 1    |       |
| ERR1163410 | 0           | 0   | 91  | 0  | 0  | 6   | 6    | 0  | 23 | 8  | 0   | 0         | 0               | 0           | 0          | 1         | 0               | 0          | 0 | 1    |       |
| ERR1163412 | 0           | 0   | 100 | 0  | 0  | 6   | 0    | 0  | 23 | 8  | 0   | 0         | 0               | 0           | 0          | 1         | 0               | 0          | 0 | 1    |       |
| ERR1163415 | 0           | 0   | 100 | 0  | 0  | 6   | 0    | 0  | 23 | 8  | 0   | 0         | 0               | 0           | 0          | 1         | 0               | 0          | 0 | 1    |       |
| ERR1163418 | 0           | 0   | 100 | 0  | 0  | 6   | 6    | 0  | 23 | 8  | 0   | 0         | 0               | 0           | 0          | 1         | 0               | 0          | 0 | 1    |       |
| ERR1163419 | 0           | 0   | 91  | 0  | 0  | 6   | 6    | 0  | 23 | 8  | 0   | 0         | 0               | 0           | 0          | 1         | 0               | 0          | 0 | 1    |       |
| ERR1163420 | 0           | 0   | 100 | 0  | 0  | 6   | 0    | 0  | 23 | 8  | 0   | 0         | 0               | 0           | 0          | 1         | 0               | 0          | 0 | 1    |       |
| ERR1163421 | 0           | 0   | 100 | 0  | 0  | 6   | 0    | 0  | 23 | 8  | 0   | 0         | 0               | 0           | 0          | 1         | 0               | 0          | 0 | 1    |       |
| ERR1163422 | 0           | 0   | 100 | 0  | 0  | 6   | 0    | 0  | 23 | 8  | 0   | 0         | 0               | 0           | 0          | 1         | 0               | 0          | 0 | 1    |       |
| ERR1163423 | 0           | 0   | 100 | 0  | 0  | 6   | 0    | 0  | 23 | 8  | 0   | 0         | 0               | 0           | 0          | 1         | 0               | 0          | 0 | 1    |       |
| ERR1163426 | 0           | 0   | 91  | 0  | 0  | 6   | 6    | 0  | 15 | 8  | 0   | 0         | 0               | 0           | 0          | 1         | 0               | 0          | 0 | 1    |       |
| ERR1163428 | 0           | 0   | 100 | 0  | 0  | 6   | 6    | 0  | 23 | 8  | 0   | 0         | 0               | 0           | 0          | 1         | 0               | 0          | 0 | 1    |       |
| ERR1163429 | 0           | 0   | 100 | 0  | 0  | 6   | 0    | 0  | 23 | 8  | 0   | 0         | 0               | 0           | 0          | 1         | 0               | 0          | 0 | 1    |       |
| ERR1163430 | 0           | 0   | 100 | 0  | 0  | 6   | 0    | 0  | 23 | 8  | 0   | 0         | 0               | 0           | 0          | 1         | 0               | 0          | 0 | 1    |       |
| ERR1163431 | 0           | 0   | 100 | 0  | 0  | 6   | 0    | 0  | 23 | 8  | 0   | 0         | 0               | 0           | 0          | 1         | 0               | 0          | 0 | 1    |       |
| ERR1163435 | 0           | 0   | 91  | 0  | 0  | 6   | 19   | 0  | 23 | 8  | 0   | 0         | 0               | 0           | 0          | 1         | 0               | 0          | 0 | 1    |       |
| ERR1163436 | 0           | 0   | 100 | 0  | 0  | 6   | 0    | 0  | 23 | 8  | 0   | 0         | 0               | 0           | 0          | 1         | 0               | 0          | 0 | 1    |       |
| ERR1163437 | 0           | 0   | 100 | 0  | 0  | 6   | 0    | 0  | 23 | 8  | 0   | 0         | 0               | 0           | 0          | 1         | 0               | 0          | 0 | 1    |       |
| ERR1163438 | 0           | 0   | 100 | 0  | 0  | 6   | 0    | 0  | 23 | 8  | 0   | 0         | 0               | 0           | 0          | 1         | 0               | 0          | 0 | 1    |       |
| ERR1163439 | 0           | 0   | 100 | 0  | 0  | 6   | 0    | 0  | 23 | 8  | 0   | 0         | 0               | 0           | 0          | 1         | 0               | 0          | 0 | 1    |       |
| ERR1163440 | 0           | 0   | 100 | 0  | 0  | 6   | 6    | 0  | 23 | 8  | 0   | 0         | 0               | 0           | 0          | 1         | 0               | 0          | 0 | 1    |       |
| ERR1163442 | 0           | 0   | 100 | 0  | 7  | 6   | 0    | 0  | 23 | 8  | 0   | 0         | 0               | 0           | 0          | 1         | 0               | 0          | 0 | 1    |       |
| ERR1163444 | 0           | 0   | 100 | 0  | 0  | 6   | 0    | 0  | 23 | 8  | 0   | 0         | 0               | 0           | 0          | 1         | 0               | 0          | 0 | 1    |       |
| ERR1163445 | 0           | 0   | 100 | 0  | 0  | 6   | 0    | 0  | 23 | 8  | 0   | 0         | 0               | 0           | 0          | 1         | 0               | 0          | 0 | 1    |       |
| ERR1163446 | 0           | 0   | 91  | 0  | 0  | 6   | 0    | 0  | 23 | 8  | 0   | 0         | 0               | 0           | 0          | 1         | 0               | 0          | 0 | 1    |       |
| ERR1163447 | 0           | 0   | 100 | 0  | 0  | 6   | 0    | 0  | 23 | 8  | 0   | 0         | 0               | 0           | 0          | 1         | 0               | 0          | 0 | 1    |       |
| ERR1163451 | 0           | 8   | 9   | 0  | 0  | 6   | 0    | 38 | 0  | 0  | 0   | 0         | 0               | 1           | 0          | 0         | 0               | 1          | 1 |      |       |
| ERR1163452 | 0           | 0   | 100 | 0  | 0  | 6   | 0    | 0  | 23 | 8  | 0   | 0         | 0               | 0           | 0          | 1         | 0               | 0          | 0 | 1    |       |
| ERR1163453 | 0           | 0   | 91  | 0  | 0  | 6   | 0    | 0  | 23 | 8  | 0   | 0         | 0               | 0           | 0          | 1         | 0               | 0          | 0 | 1    |       |
| ERR1163454 | 0           | 0   | 100 | 0  | 0  | 6   | 0    | 0  | 23 | 8  | 0   | 0         | 0               | 0           | 0          | 1         | 0               | 0          | 0 | 1    |       |
| ERR1163455 | 0           | 0   | 100 | 0  | 0  | 6   | 0    | 0  | 23 | 8  | 0   | 0         | 0               | 0           | 0          | 1         | 0               | 0          | 0 | 1    |       |
| ERR1163458 | 0           | 0   | 91  | 0  | 0  | 6   | 0    | 0  | 23 | 8  | 0   | 0         | 0               | 0           | 0          | 1         | 0               | 0          | 0 | 1    |       |
| ERR1163460 | 0           | 0   | 91  | 0  | 0  | 6   | 0    | 0  | 23 | 8  | 0   | 0         | 0               | 0           | 0          | 1         | 0               | 0          | 0 | 1    |       |



|            |    |     |     |   |   |   |    |    |    |   |   |   |   |   |   |   |   |   |   |   |
|------------|----|-----|-----|---|---|---|----|----|----|---|---|---|---|---|---|---|---|---|---|---|
| ERR1163574 | 0  | 0   | 91  | 0 | 0 | 6 | 0  | 0  | 8  | 8 | 0 | 0 | 0 | 0 | 0 | 0 | 1 | 0 | 0 | 1 |
| ERR1163575 | 0  | 0   | 91  | 0 | 0 | 6 | 0  | 0  | 8  | 8 | 0 | 0 | 0 | 0 | 0 | 0 | 1 | 0 | 0 | 1 |
| ERR1163576 | 0  | 0   | 91  | 0 | 0 | 0 | 0  | 0  | 8  | 8 | 0 | 0 | 0 | 0 | 0 | 0 | 1 | 0 | 0 | 1 |
| ERR1163577 | 0  | 0   | 91  | 0 | 0 | 6 | 0  | 0  | 8  | 8 | 0 | 0 | 0 | 0 | 0 | 0 | 1 | 0 | 0 | 1 |
| ERR1163578 | 0  | 0   | 100 | 0 | 0 | 0 | 0  | 0  | 8  | 8 | 0 | 0 | 0 | 0 | 0 | 0 | 1 | 0 | 0 | 1 |
| ERR1163579 | 0  | 0   | 91  | 0 | 0 | 6 | 0  | 0  | 8  | 8 | 0 | 0 | 0 | 0 | 0 | 0 | 1 | 0 | 0 | 1 |
| ERR1163580 | 0  | 0   | 91  | 0 | 0 | 6 | 0  | 0  | 8  | 8 | 0 | 0 | 0 | 0 | 0 | 0 | 1 | 0 | 0 | 1 |
| ERR1163581 | 0  | 0   | 91  | 0 | 0 | 6 | 0  | 0  | 8  | 8 | 0 | 0 | 0 | 0 | 0 | 0 | 1 | 0 | 0 | 1 |
| ERR1163582 | 0  | 0   | 91  | 0 | 0 | 0 | 0  | 0  | 0  | 8 | 0 | 0 | 0 | 0 | 0 | 0 | 1 | 0 | 0 | 1 |
| ERR1163583 | 0  | 0   | 91  | 0 | 0 | 0 | 0  | 0  | 8  | 8 | 0 | 0 | 0 | 0 | 0 | 0 | 1 | 0 | 0 | 1 |
| ERR1163584 | 0  | 0   | 73  | 0 | 0 | 6 | 0  | 0  | 8  | 8 | 0 | 0 | 0 | 0 | 0 | 0 | 1 | 0 | 0 | 1 |
| ERR1163585 | 0  | 0   | 91  | 0 | 0 | 0 | 0  | 0  | 8  | 8 | 0 | 0 | 0 | 0 | 0 | 0 | 1 | 0 | 0 | 1 |
| ERR1163587 | 0  | 0   | 82  | 0 | 0 | 0 | 0  | 0  | 8  | 8 | 0 | 0 | 0 | 0 | 0 | 0 | 1 | 0 | 0 | 1 |
| ERR1163588 | 0  | 0   | 91  | 0 | 0 | 6 | 0  | 0  | 8  | 8 | 0 | 0 | 0 | 0 | 0 | 0 | 1 | 0 | 0 | 1 |
| ERR1163589 | 0  | 0   | 91  | 0 | 0 | 6 | 0  | 0  | 8  | 8 | 0 | 0 | 0 | 0 | 0 | 0 | 1 | 0 | 0 | 1 |
| ERR1163590 | 0  | 0   | 91  | 0 | 0 | 6 | 0  | 0  | 8  | 8 | 0 | 0 | 0 | 0 | 0 | 0 | 1 | 0 | 0 | 1 |
| ERR1163591 | 0  | 0   | 91  | 0 | 0 | 0 | 0  | 0  | 0  | 8 | 0 | 0 | 0 | 0 | 0 | 0 | 1 | 0 | 0 | 1 |
| ERR1163610 | 14 | 100 | 0   | 0 | 0 | 6 | 0  | 0  | 0  | 0 | 0 | 0 | 0 | 0 | 0 | 0 | 0 | 1 | 0 | 1 |
| ERR1163618 | 0  | 0   | 91  | 0 | 0 | 6 | 6  | 0  | 15 | 8 | 0 | 0 | 0 | 0 | 0 | 0 | 1 | 0 | 0 | 1 |
| ERR1163619 | 0  | 0   | 91  | 0 | 0 | 6 | 6  | 0  | 15 | 8 | 0 | 0 | 0 | 0 | 0 | 0 | 1 | 0 | 0 | 1 |
| ERR1163620 | 0  | 0   | 91  | 0 | 0 | 6 | 6  | 0  | 23 | 8 | 0 | 0 | 0 | 0 | 0 | 0 | 1 | 0 | 0 | 1 |
| ERR1163621 | 0  | 0   | 91  | 0 | 0 | 6 | 6  | 0  | 8  | 8 | 0 | 0 | 0 | 0 | 0 | 0 | 1 | 0 | 0 | 1 |
| ERR1163623 | 0  | 0   | 91  | 0 | 0 | 6 | 0  | 38 | 15 | 8 | 0 | 0 | 0 | 0 | 0 | 0 | 1 | 0 | 1 | 1 |
| ERR1163625 | 0  | 0   | 91  | 0 | 0 | 0 | 0  | 0  | 8  | 8 | 0 | 0 | 0 | 0 | 0 | 0 | 1 | 0 | 0 | 1 |
| ERR1163627 | 0  | 0   | 82  | 0 | 0 | 6 | 0  | 0  | 8  | 8 | 0 | 0 | 0 | 0 | 0 | 0 | 1 | 0 | 0 | 1 |
| ERR1163633 | 0  | 0   | 82  | 0 | 0 | 0 | 0  | 0  | 0  | 8 | 0 | 0 | 0 | 0 | 0 | 0 | 1 | 0 | 0 | 1 |
| ERR1163634 | 0  | 96  | 0   | 0 | 0 | 6 | 0  | 0  | 0  | 0 | 0 | 0 | 0 | 0 | 0 | 0 | 0 | 1 | 0 | 1 |
| ERR1163635 | 0  | 0   | 91  | 0 | 0 | 6 | 0  | 0  | 15 | 8 | 0 | 0 | 0 | 0 | 0 | 0 | 1 | 0 | 0 | 1 |
| ERR1163637 | 0  | 0   | 91  | 0 | 0 | 6 | 6  | 0  | 8  | 8 | 0 | 0 | 0 | 0 | 0 | 0 | 1 | 0 | 0 | 1 |
| ERR1163641 | 0  | 0   | 91  | 0 | 0 | 6 | 0  | 0  | 8  | 8 | 0 | 0 | 0 | 0 | 0 | 0 | 1 | 0 | 0 | 1 |
| ERR1163642 | 0  | 0   | 91  | 0 | 0 | 0 | 0  | 0  | 0  | 8 | 0 | 0 | 0 | 0 | 0 | 0 | 1 | 0 | 0 | 1 |
| ERR1163644 | 0  | 0   | 91  | 0 | 0 | 6 | 6  | 0  | 8  | 8 | 0 | 0 | 0 | 0 | 0 | 0 | 1 | 0 | 0 | 1 |
| ERR1163646 | 29 | 0   | 64  | 0 | 0 | 0 | 19 | 0  | 8  | 8 | 0 | 0 | 0 | 0 | 0 | 0 | 1 | 0 | 0 | 1 |
| ERR1163648 | 0  | 0   | 91  | 0 | 0 | 6 | 0  | 0  | 8  | 8 | 0 | 0 | 0 | 0 | 0 | 0 | 1 | 0 | 0 | 1 |
| ERR1163649 | 0  | 0   | 0   | 7 | 0 | 0 | 6  | 38 | 0  | 0 | 0 | 0 | 0 | 1 | 0 | 0 | 0 | 0 | 1 | 1 |
| ERR1163654 | 0  | 96  | 0   | 0 | 0 | 0 | 0  | 38 | 0  | 0 | 0 | 1 | 0 | 0 | 0 | 0 | 0 | 1 | 1 | 1 |
| ERR1163656 | 0  | 88  | 0   | 0 | 0 | 6 | 0  | 0  | 0  | 0 | 0 | 0 | 0 | 0 | 0 | 0 | 0 | 1 | 0 | 1 |
| ERR1163663 | 0  | 0   | 91  | 0 | 0 | 6 | 0  | 0  | 8  | 8 | 0 | 0 | 0 | 0 | 0 | 0 | 1 | 0 | 0 | 1 |
| ERR1163664 | 0  | 88  | 0   | 0 | 0 | 6 | 0  | 0  | 0  | 0 | 0 | 0 | 0 | 0 | 0 | 0 | 0 | 1 | 0 | 1 |
| ERR1163665 | 0  | 0   | 91  | 0 | 0 | 6 | 6  | 0  | 23 | 8 | 0 | 0 | 0 | 0 | 0 | 0 | 1 | 0 | 0 | 1 |
| ERR1163667 | 0  | 0   | 91  | 0 | 0 | 6 | 6  | 0  | 15 | 8 | 0 | 0 | 0 | 0 | 0 | 0 | 1 | 0 | 0 | 1 |
| ERR1163671 | 0  | 0   | 91  | 0 | 0 | 6 | 0  | 0  | 8  | 8 | 0 | 0 | 0 | 0 | 0 | 0 | 1 | 0 | 0 | 1 |
| ERR1163673 | 0  | 0   | 91  | 0 | 0 | 6 | 6  | 0  | 15 | 8 | 0 | 0 | 0 | 0 | 0 | 0 | 1 | 0 | 0 | 1 |
| ERR1163674 | 0  | 0   | 91  | 0 | 0 | 6 | 6  | 0  | 8  | 8 | 0 | 0 | 0 | 0 | 0 | 0 | 1 | 0 | 0 | 1 |
| ERR1163675 | 0  | 0   | 91  | 0 | 0 | 6 | 6  | 0  | 8  | 8 | 0 | 0 | 0 | 0 | 0 | 0 | 1 | 0 | 0 | 1 |
| ERR1163678 | 0  | 0   | 91  | 0 | 0 | 6 | 0  | 0  | 8  | 8 | 0 | 0 | 0 | 0 | 0 | 0 | 1 | 0 | 0 | 1 |
| ERR1163681 | 0  | 0   | 91  | 0 | 0 | 6 | 6  | 0  | 8  | 8 | 0 | 0 | 0 | 0 | 0 | 0 | 1 | 0 | 0 | 1 |
| ERR1163682 | 0  | 88  | 0   | 0 | 0 | 6 | 0  | 0  | 0  | 0 | 0 | 0 | 0 | 0 | 0 | 0 | 0 | 1 | 0 | 1 |
| ERR1163683 | 0  | 0   | 91  | 0 | 0 | 6 | 6  | 0  | 23 | 8 | 0 | 0 | 0 | 0 | 0 | 0 | 1 | 0 | 0 | 1 |
| ERR1163686 | 0  | 0   | 82  | 0 | 0 | 6 | 0  | 0  | 8  | 8 | 0 | 0 | 0 | 0 | 0 | 0 | 1 | 0 | 0 | 1 |
| ERR1163687 | 0  | 0   | 91  | 0 | 0 | 6 | 0  | 0  | 15 | 8 | 0 | 0 | 0 | 0 | 0 | 0 | 1 | 0 | 0 | 1 |
| ERR1163688 | 0  | 0   | 91  | 0 | 0 | 6 | 0  | 0  | 8  | 8 | 0 | 0 | 0 | 0 | 0 | 0 | 1 | 0 | 0 | 1 |
| ERR1163689 | 0  | 0   | 91  | 0 | 0 | 6 | 6  | 0  | 15 | 8 | 0 | 0 | 0 | 0 | 0 | 0 | 1 | 0 | 0 | 1 |
| ERR1163690 | 0  | 0   | 91  | 0 | 0 | 6 | 6  | 0  | 15 | 8 | 0 | 0 | 0 | 0 | 0 | 0 | 1 | 0 | 0 | 1 |
| ERR1163691 | 0  | 0   | 91  | 0 | 0 | 6 | 6  | 0  | 23 | 8 | 0 | 0 | 0 | 0 | 0 | 0 | 1 | 0 | 0 | 1 |
| ERR1163692 | 0  | 0   | 91  | 0 | 0 | 6 | 0  | 0  | 23 | 8 | 0 | 0 | 0 | 0 | 0 | 0 | 1 | 0 | 0 | 1 |
| ERR1163694 | 0  | 0   | 91  | 0 | 0 | 6 | 0  | 0  | 23 | 8 | 0 | 0 | 0 | 0 | 0 | 0 | 1 | 0 | 0 | 1 |
| ERR1163695 | 0  | 0   | 91  | 0 | 0 | 6 | 0  | 0  | 8  | 8 | 0 | 0 | 0 | 0 | 0 | 0 | 1 | 0 | 0 | 1 |
| ERR1163696 | 0  | 0   | 91  | 0 | 0 | 6 | 0  | 0  | 23 | 8 | 0 | 0 | 0 | 0 | 0 | 0 | 1 | 0 | 0 | 1 |
| ERR1163701 | 0  | 0   | 91  | 0 | 0 | 6 | 0  | 0  | 15 | 8 | 0 | 0 | 0 | 0 | 0 | 0 | 1 | 0 | 0 | 1 |
| ERR1163702 | 0  | 96  | 0   | 0 | 0 | 6 | 0  | 0  | 0  | 0 | 0 | 0 | 0 | 0 | 0 | 0 | 0 | 1 | 0 | 1 |
| ERR1163703 | 0  | 0   | 91  | 0 | 0 | 6 | 6  | 0  | 23 | 8 | 0 | 0 | 0 | 0 | 0 | 0 | 1 | 0 | 0 | 1 |
| ERR1163704 | 0  | 0   | 91  | 0 | 0 | 6 | 6  | 0  | 15 | 8 | 0 | 0 | 0 | 0 | 0 | 0 | 1 | 0 | 0 | 1 |
| ERR1163705 | 0  | 0   | 91  | 0 | 0 | 6 | 6  | 0  | 15 | 8 | 0 | 0 | 0 | 0 | 0 | 0 | 1 | 0 | 0 | 1 |
| ERR1163706 | 0  | 0   | 91  | 0 | 0 | 6 | 0  | 0  | 8  | 8 | 0 | 0 | 0 | 0 | 0 | 0 | 1 | 0 | 0 | 1 |
| ERR1163709 | 0  | 0   | 100 | 0 | 0 | 6 | 0  | 0  | 23 | 8 | 0 | 0 | 0 | 0 | 0 | 0 | 1 | 0 | 0 | 1 |
| ERR1163714 | 0  | 0   | 91  | 0 | 0 | 6 | 6  | 0  | 23 | 8 | 0 | 0 | 0 | 0 | 0 | 0 | 1 | 0 | 0 | 1 |
| ERR1163715 | 0  | 0   | 91  | 0 | 0 | 6 | 0  | 0  | 8  | 8 | 0 | 0 | 0 | 0 | 0 | 0 | 1 | 0 | 0 | 1 |
| ERR1163716 | 0  | 0   | 73  | 0 | 0 | 0 | 0  | 0  | 8  | 8 | 0 | 0 | 0 | 0 | 0 | 0 | 1 | 0 | 0 | 1 |
| ERR1163719 | 0  | 0   | 91  | 0 | 0 | 6 | 0  | 0  | 15 | 8 | 0 | 0 | 0 | 0 | 0 | 0 | 1 | 0 | 0 | 1 |
| ERR1163722 | 0  | 100 | 0   | 0 | 0 | 6 | 0  | 0  | 0  | 0 | 0 | 0 | 0 | 0 | 0 | 0 | 0 | 1 | 0 | 1 |
| ERR1163729 | 0  | 0   | 100 | 0 | 0 | 6 | 0  | 0  | 23 | 8 | 0 | 0 | 0 | 0 | 0 | 0 | 1 | 0 | 0 | 1 |
| ERR1163730 | 0  | 96  | 0   | 0 | 0 | 6 | 0  | 0  | 0  | 0 | 0 | 0 | 0 | 0 | 0 | 0 | 0 | 1 | 0 | 1 |
| ERR1163734 | 0  | 0   | 100 | 0 | 0 | 6 | 0  | 0  | 23 | 8 | 0 | 0 | 0 | 0 | 0 | 0 | 1 | 0 | 0 | 1 |
| ERR1163741 | 0  | 0   | 91  | 0 | 0 | 6 | 6  | 0  | 8  | 8 | 0 | 0 | 0 | 0 | 0 | 0 | 1 | 0 | 0 | 1 |





















Supplementary Table 5

| Gene              | Non-unique Gene name | Annotation                                                      | Orthologue | coverage | %nt id to <i>C. jejuni</i> |
|-------------------|----------------------|-----------------------------------------------------------------|------------|----------|----------------------------|
| <b>Group 2</b>    |                      |                                                                 |            |          |                            |
| <b>ERR1163614</b> | <b>XIII</b>          |                                                                 |            |          |                            |
| group_7984        | pglH_2               | GalNAc-alpha-(1->4)-GalNAc-alpha-(1->3)-diNAcBac-PP-undecapreno | 4055       | 50       | 76                         |
| gspA              |                      | General stress protein A                                        | 4003       | N/A      | N/A                        |
| group_7985        | epsH                 | Putative glycosyltransferase EpsH                               | 4056       | 36       | 82                         |
| group_7986        | cstIII               | GT-42 glycosyltransferase                                       | 4057       | 100      | 82                         |
| legI_1            |                      | N,N'-diacetyllegionaminic acid synthase                         | 4155       | 100      | 83                         |
| group_2770        | siaA                 | UDP-N-acetylglucosamine 2-epimerase                             | 4014       | 99       | 87                         |
| group_7987        |                      | hypothetical protein                                            | 4058       | 98       | 84                         |
| neuA_2            |                      | N-acylneuraminate cytidyltransferase                            | 4059       | 96       | 77                         |
| <b>ERR1163713</b> | <b>XIV</b>           |                                                                 |            |          |                            |
| pglH_1            |                      | GalNAc-alpha-(1->4)-GalNAc-alpha-(1->3)-diNAcBac-PP-undecapreno | 4002       | 69       | 73                         |
| gspA              |                      | General stress protein A                                        | 4003       | N/A      | N/A                        |
| group_7985        | epsH                 | Putative glycosyltransferase EpsH                               | 4056       | 36       | 82                         |
| group_7986        | cstIII               | GT-42 glycosyltransferase                                       | 4057       | 100      | 82                         |
| legI_1            |                      | N,N'-diacetyllegionaminic acid synthase                         | 4155       | 100      | 83                         |
| group_2770        | siaA                 | UDP-N-acetylglucosamine 2-epimerase                             | 4014       | 99       | 87                         |
| group_7987        |                      | hypothetical protein                                            | 4058       | 98       | 84                         |
| neuA_2            |                      | N-acylneuraminate cytidyltransferase                            | 4059       | 96       | 77                         |
| <b>SRR5152313</b> | <b>incomplete</b>    |                                                                 |            |          |                            |
| group_10079       | epsJ_4               | putative glycosyltransferase EpsJ                               | 4188       | 100      | 100                        |
| group_10078       |                      | hypothetical protein                                            | 4186       | 100      | 100                        |
| group_10077       | epsJ_3               | putative glycosyltransferase EpsJ                               | 4187       | 100      | 100                        |
| ?                 |                      |                                                                 | ?          | 100      | 100                        |
| group_10088       | cstIII               | GT-42 glycosyltransferase                                       | 4159       | 100      | 100                        |
| legI_2            |                      | N,N'-diacetyllegionaminic acid synthase                         | 4181       | 100      | 100                        |
| siaA              |                      | UDP-N-acetylglucosamine 2-epimerase                             | 4182       | 100      | 100                        |
| neuA              |                      | N-acylneuraminate cytidyltransferase                            | 4183       | 100      | 100                        |
| group_10086       |                      | hypothetical protein                                            | 4184       | 100      | 100                        |

## Color code

*C. coli* clade 1*C. coli* clade 2*C. coli* clade 3

GT42 group 2 cstIII

GT42 group 4 cstII

GT42 group 5 cstV

GT42 group 6 cstVI

GT42 group 7 cstIV

Sialic acid biosynthesis genes

Capsule genes

N/A: No significant similarity found

| Gene              | Non-unique Gene name | Annotation                              | Orthologue | coverage | %nt id to <i>C. jejuni</i> |
|-------------------|----------------------|-----------------------------------------|------------|----------|----------------------------|
| <b>Group 4</b>    |                      |                                         |            |          |                            |
| <b>ERR1163434</b> | <b>XV</b>            |                                         |            |          |                            |
| group_5652        | epsJ_1               | putative glycosyltransferase EpsJ       | 4009       | 98       | 81                         |
| group_7342        |                      | hypothetical protein                    | 4010       | 98       | 87                         |
| group_7343        | epsH                 | Putative glycosyltransferase EpsH       | 4011       | 99       | 84                         |
| group_7344        | cstII                | GT-42 glycosyltransferase               | 4012       | 97       | 87                         |
| legI_1            |                      | N,N'-diacetyllegionaminic acid synthase | 4155       | 94       | 84                         |
| group_2770        | siaA                 | UDP-N-acetylglucosamine 2-epimerase     | 4014       | 100      | 87                         |

|                   |        |                                                                 |           |     |       |
|-------------------|--------|-----------------------------------------------------------------|-----------|-----|-------|
| group_7345        | neuA   | N-acylneuraminate cytidyltransferase                            | 4015      | N/A | N/A   |
| <b>ERR084011</b>  |        | <b>XVI</b>                                                      |           |     |       |
| group_5814        | pglH_1 | GalNAc-alpha-(1->4)-GalNAc-alpha-(1->3)-diNAcBac-PP-undecapreno | 4164      | 100 | 100   |
| group_5815        | epsH   | Putative glycosyltransferase EpsH                               | 4163/4172 | 100 | 97/99 |
| group_5816        | epsJ_2 | putative glycosyltransferase EpsJ                               | 4162      | 100 | 97    |
| epsH_1            |        | Putative glycosyltransferase EpsH                               | 4161      | 99  | 99    |
| group_6953        | cstII  | GT-42 glycosyltransferase                                       | 4149      | 100 | 100   |
| group_5817        | legI_1 | N,N'-diacetyllegionaminic acid synthase                         | 4150      | 100 | 100   |
| group_4682        | siaA   | UDP-N-acetylglucosamine 2-epimerase                             | 4051      | 100 | 100   |
| group_4496        | neuA   | N-acylneuraminate cytidyltransferase                            | 4052      | 100 | 100   |
| group_2414        | cat    | Streptogramin A acetyltransferase                               | 4168      | 100 | 100   |
| <b>ERR593723</b>  |        | <b>XVII</b>                                                     |           |     |       |
| group_5351        | epsJ_3 | putative glycosyltransferase EpsJ                               | 4172      | 100 | 99    |
| group_5816        | epsJ_2 | putative glycosyltransferase EpsJ                               | 4162      | 100 | 97    |
| epsH_1            |        | Putative glycosyltransferase EpsH                               | 4161      | 99  | 99    |
| group_4171        | cstII  | GT-42 glycosyltransferase                                       | 4153      | 100 | 99    |
| group_5817        | legI_1 | N,N'-diacetyllegionaminic acid synthase                         | 4150      | 100 | 100   |
| group_4682        | siaA   | UDP-N-acetylglucosamine 2-epimerase                             | 4051      | 100 | 100   |
| group_4496        | neuA   | N-acylneuraminate cytidyltransferase                            | 4052      | 100 | 100   |
| vatD              |        | Streptogramin A acetyltransferase                               | 4171      | 100 | 99    |
| group_2770        | siaA   | UDP-N-acetylglucosamine 2-epimerase                             | 4014      |     |       |
| legI_1            |        | N,N'-diacetyllegionaminic acid synthase                         | 4155      |     |       |
| rkpK              |        | UDP-glucose 6-dehydrogenase                                     | 4042      |     |       |
| group_4438        |        | UDP-glucose 4-epimerase                                         | 4041      |     |       |
| galE_2            |        | UDP-glucose 4-epimerase                                         | 4076      |     |       |
| rfbD              |        | UDP-galactopyranose mutase                                      | 4075      |     |       |
| neuA_2            |        | N-acylneuraminate cytidyltransferase                            | 4059      |     |       |
| group_2415        | epsJ_1 | putative glycosyltransferase EpsJ                               | 4169      |     |       |
| <b>SRR4242504</b> |        | <b>XVIII</b>                                                    |           |     |       |
| group_5351        | epsJ_3 | putative glycosyltransferase EpsJ                               | 4172      | 100 | 99    |
| group_5816        | epsJ_2 | putative glycosyltransferase EpsJ                               | 4162      | 100 | 97    |
| epsH_1            |        | Putative glycosyltransferase EpsH                               | 4161      | 99  | 99    |
| group_4169        | cstII  | GT-42 glycosyltransferase                                       | 4158      | 100 | 99    |
| group_5817        | legI_1 | N,N'-diacetyllegionaminic acid synthase                         | 4150      | 100 | 100   |
| group_4682        | siaA   | UDP-N-acetylglucosamine 2-epimerase                             | 4051      | 100 | 100   |
| group_4700        |        | hypothetical protein                                            | 4179      | 100 | 99    |
| group_4496        | neuA   | N-acylneuraminate cytidyltransferase                            | 4052      | 100 | 100   |



|                       |        |                                                                 |      |     |     |
|-----------------------|--------|-----------------------------------------------------------------|------|-----|-----|
| vatD                  |        | Streptogramin A acetyltransferase                               | 4171 | 100 | 99  |
| group_2414            | cat    | Streptogramin A acetyltransferase                               | 4168 | 100 | 99  |
| group_2770            | siaA   | UDP-N-acetylglucosamine 2-epimerase                             | 4014 |     |     |
| legI_1                |        | N,N'-diacetyllegionaminic acid synthase                         | 4155 |     |     |
| rkpK                  |        | UDP-glucose 6-dehydrogenase                                     | 4042 |     |     |
| group_4438            |        | UDP-glucose 4-epimerase                                         | 4041 |     |     |
| galE_2                |        | UDP-glucose 4-epimerase                                         | 4076 |     |     |
| rfbD                  |        | UDP-galactopyranose mutase                                      | 4075 |     |     |
| neuA_2                |        | N-acylneuraminate cytidyltransferase                            | 4059 |     |     |
| <b>SRR4453631 XIX</b> |        |                                                                 |      |     |     |
| group_6437            | pglH_1 | GalNAC-alpha-(1->4)-GalNAC-alpha-(1->3)-diNACBac-PP-undecapreno | 4180 | 100 | 85  |
| group_5351            | epsJ_3 | putative glycosyltransferase EpsJ                               | 4172 | 100 | 99  |
| group_5816            | epsJ_2 | putative glycosyltransferase EpsJ                               | 4162 | 100 | 97  |
| epsH_1                |        | Putative glycosyltransferase EpsH                               | 4161 | 99  | 99  |
| group_4171            | cstII  | GT-42 glycosyltransferase                                       | 4153 | 100 | 99  |
| group_5817            | legI_1 | N,N'-diacetyllegionaminic acid synthase                         | 4150 | 100 | 100 |
| group_4682            | siaA   | UDP-N-acetylglucosamine 2-epimerase                             | 4051 | 100 | 100 |
| group_4496            | neuA   | N-acylneuraminate cytidyltransferase                            | 4052 | 100 | 100 |
| vatD                  |        | Streptogramin A acetyltransferase                               | 4171 | 100 | 99  |
| <b>ERR593755 XX</b>   |        |                                                                 |      |     |     |
| group_5351            | epsJ_3 | putative glycosyltransferase EpsJ                               | 4172 | 100 | 99  |
| group_4168            | cstII  | GT-42 glycosyltransferase                                       | 4158 | 100 | 99  |
| group_5817            | legI_1 | N,N'-diacetyllegionaminic acid synthase                         | 4150 | 100 | 100 |
| group_4682            | siaA   | UDP-N-acetylglucosamine 2-epimerase                             | 4051 | 100 | 100 |
| group_4496            | neuA   | N-acylneuraminate cytidyltransferase                            | 4052 | 100 | 100 |
| vatD                  |        | Streptogramin A acetyltransferase                               | 4171 | 100 | 99  |
| <b>SRR5794756 XXI</b> |        |                                                                 |      |     |     |
| group_10251           | epsJ_1 | putative glycosyltransferase EpsJ                               | 4197 | 67  | 91  |
| group_10252           |        | hypothetical protein                                            | 4196 | 100 | 100 |
| group_10253           | epsJ_2 | putative glycosyltransferase EpsJ                               | 4195 | 100 | 100 |
| group_4169            | cstII  | GT-42 glycosyltransferase                                       | 4158 | 100 | 99  |
| group_5817            | legI_1 | N,N'-diacetyllegionaminic acid synthase                         | 4150 | 100 | 100 |
| group_4682            | siaA   | UDP-N-acetylglucosamine 2-epimerase                             | 4051 | 100 | 100 |
| group_4700            |        | hypothetical protein                                            | 4179 | 100 | 99  |
| group_4496            | neuA   | N-acylneuraminate cytidyltransferase                            | 4052 | 100 | 100 |
| vatD                  |        | Streptogramin A acetyltransferase                               | 4171 | 100 | 99  |

| <b>SRR3215130</b>             |        | <b>XXII</b>                                                     |           |       |       |  |
|-------------------------------|--------|-----------------------------------------------------------------|-----------|-------|-------|--|
| group_5814                    | pglH_1 | GalNAc-alpha-(1->4)-GalNAc-alpha-(1->3)-diNAcBac-PP-undecapreno | 4164      | 100   | 100   |  |
| group_5351                    | epsJ_3 | putative glycosyltransferase EpsJ                               | 4172      | 100   | 99    |  |
| group_5816                    | epsJ_2 | putative glycosyltransferase EpsJ                               | 4162      | 100   | 97    |  |
| epsH_1                        |        | Putative glycosyltransferase EpsH                               | 4161      | 99    | 99    |  |
| group_4169                    | cstII  | GT-42 glycosyltransferase                                       | 4158      | 100   | 99    |  |
| group_5817                    | legI_1 | N,N'-diacetyllegionaminic acid synthase                         | 4150      | 100   | 100   |  |
| group_4682                    | siaA   | UDP-N-acetylglucosamine 2-epimerase                             | 4051      | 100   | 100   |  |
| group_4700                    |        | hypothetical protein                                            | 4179      | 100   | 99    |  |
| group_4496                    | neuA   | N-acylneuraminate cytidyltransferase                            | 4052      | 100   | 100   |  |
| group_2414                    | cat    | Streptogramin A acetyltransferase                               | 4168      | 100   | 99    |  |
| <b>ERR1163833, SRR2920321</b> |        | <b>XXIII</b>                                                    |           |       |       |  |
| group_5920                    | cstII  | GT-42 glycosyltransferase                                       | 4132      | 98    | 87    |  |
| legI_1                        |        | N,N'-diacetyllegionaminic acid synthase                         | 4155      | 94    | 84    |  |
| group_2770                    | siaA   | UDP-N-acetylglucosamine 2-epimerase                             | 4014      | 100   | 87    |  |
| group_5314                    | neuA   | N-acylneuraminate cytidyltransferase                            | 4131/4156 | 91/NA | 77/NA |  |
| group_8887                    | vatD   | Streptogramin A acetyltransferase                               | 4130/4173 | 100   | 85/89 |  |

| <b>Group 4 and 5</b> |                      |                                                                 |            |          |                            |  |
|----------------------|----------------------|-----------------------------------------------------------------|------------|----------|----------------------------|--|
| Gene                 | Non-unique Gene name | Annotation                                                      | Orthologue | coverage | %nt id to <i>C. jejuni</i> |  |
| <b>SRR1975100</b>    |                      | <b>XXIV</b>                                                     |            |          |                            |  |
| group_9352           | pglH_1               | GalNAc-alpha-(1->4)-GalNAc-alpha-(1->3)-diNAcBac-PP-undecapreno | 4175       | 99       | 78                         |  |
| group_5160           | cstV                 | GT-42 glycosyltransferase                                       | 4139       | N/A      | N/A                        |  |
| group_1515           | legI_1               | N,N'-diacetyllegionaminic acid synthase                         | 4013       | N/A      | N/A                        |  |
| group_5920           | cstII                | GT-42 glycosyltransferase                                       | 4132       | 99       | 88                         |  |
| legI_1               |                      | N,N'-diacetyllegionaminic acid synthase                         | 4155       | 100      | 83                         |  |
| group_2770           | siaA                 | UDP-N-acetylglucosamine 2-epimerase                             | 4014       | 100      | 86                         |  |
| group_5314           | neuA                 | N-acylneuraminate cytidyltransferase                            | 4131       | 91       | 77                         |  |
| group_8887           | vatD                 | Streptogramin A acetyltransferase                               | 4130       | 100      | 85                         |  |

| <b>Group 5</b>    |                      |                                                                 |            |          |                            |  |
|-------------------|----------------------|-----------------------------------------------------------------|------------|----------|----------------------------|--|
| Gene              | Non-unique Gene name | Annotation                                                      | Orthologue | coverage | %nt id to <i>C. jejuni</i> |  |
| <b>ERR1163655</b> |                      | <b>IX</b>                                                       |            |          |                            |  |
| group_5159        | pglH_2               | GalNAc-alpha-(1->4)-GalNAc-alpha-(1->3)-diNAcBac-PP-undecapreno | 4138       | 95       | 78                         |  |
| group_5160        | cstV                 | GT-42 glycosyltransferase                                       | 4139       | N/A      | N/A                        |  |
| group_1515        | legI_1               | N,N'-diacetyllegionaminic acid synthase                         | 4013       | 99       | 84                         |  |
| group_2770        | siaA                 | UDP-N-acetylglucosamine 2-epimerase                             | 4014       | 100      | 87                         |  |
| group_4585        | neuA                 | N-acylneuraminate cytidyltransferase                            | 4146       | N/A      | N/A                        |  |
| group_8111        | gspA                 | General stress protein A                                        | 4147       | N/A      | N/A                        |  |

| ERR1163885, ERR1163441, ERR1163615, ERR1163639, ERR1163676, ERR1163717, ERR1163831 |        |                                                                 | XXV       |        |        |
|------------------------------------------------------------------------------------|--------|-----------------------------------------------------------------|-----------|--------|--------|
| group_5159                                                                         | pglH_2 | GalNAc-alpha-(1->4)-GalNAc-alpha-(1->3)-diNAcBac-PP-undecapreno | 4138      | 95     | 78     |
| group_5160                                                                         | cstV   | GT-42 glycosyltransferase                                       | 4139      | N/A    | N/A    |
| group_1515                                                                         | legI_1 | N,N'-diacetyllegionaminic acid synthase                         | 4013      | 99     | 84     |
| group_2770                                                                         | siaA   | UDP-N-acetylglucosamine 2-epimerase                             | 4014      | 100    | 87     |
| group_4585                                                                         | neuA   | N-acylneuraminate cytidyltransferase                            | 4146/4148 | N/A 95 | N/A 78 |

| ERR1163416, ERR1163494, ERR1163599, ERR1163863 |        |                                                                 | XXVI |     |     |
|------------------------------------------------|--------|-----------------------------------------------------------------|------|-----|-----|
| group_5159                                     | pglH_2 | GalNAc-alpha-(1->4)-GalNAc-alpha-(1->3)-diNAcBac-PP-undecapreno | 4138 | 95  | 78  |
| group_5160                                     | cstV   | GT-42 glycosyltransferase                                       | 4139 | N/A | N/A |
| group_1515                                     | legI_1 | N,N'-diacetyllegionaminic acid synthase                         | 4013 | 99  | 84  |
| group_7292                                     | siaA   | UDP-N-acetylglucosamine 2-epimerase                             | 4140 | 82  | 88  |
| group_7293                                     |        | hypothetical protein                                            | 4141 | N/A | N/A |
| group_7294                                     |        | hypothetical protein                                            | 4142 | 97  | 78  |
| group_7295                                     | neuA   | N-acylneuraminate cytidyltransferase                            | 4143 | N/A | N/A |

| Group 6                       |                      |                                                                 |            |          |                            |  |
|-------------------------------|----------------------|-----------------------------------------------------------------|------------|----------|----------------------------|--|
| Gene                          | Non-unique Gene name | Annotation                                                      | Orthologue | coverage | %nt id to <i>C. jejuni</i> |  |
| <b>SRR5005386</b>             | <b>III</b>           |                                                                 |            |          |                            |  |
| pglH_1                        |                      | GalNAc-alpha-(1->4)-GalNAc-alpha-(1->3)-diNAcBac-PP-undecapreno | 4002       | 69       | 73                         |  |
| gspA                          |                      | General stress protein A                                        | 4003       | N/A      | N/A                        |  |
| group_5761                    | epsJ_1               | putative glycosyltransferase EpsJ                               | 4004       | 35       | 84                         |  |
| group_2111                    |                      | hypothetical protein                                            | 4211       | N/A      | N/A                        |  |
| group_3997                    | cstVI                | GT-42 glycosyltransferase                                       | 4127/cst-F | N/A      | N/A                        |  |
| <b>ERR1163830</b>             | <b>XXVII</b>         |                                                                 |            |          |                            |  |
| group_8851                    | epsJ_3               | putative glycosyltransferase EpsJ                               | 4129       | 66       | 75                         |  |
| group_6191                    |                      | hypothetical protein                                            | 4067       | N/A      | N/A                        |  |
| group_4660                    | epsJ_2               | putative glycosyltransferase EpsJ                               | 4068       | 97       | 80                         |  |
| group_8850                    |                      | hypothetical protein                                            | 4069       | N/A      | N/A                        |  |
| group_8256                    |                      | hypothetical protein                                            | 4070       | N/A      | N/A                        |  |
| group_4000                    | cstVI                | GT-42 glycosyltransferase                                       | 4200       | N/A      | N/A                        |  |
| <b>ERR1163806, ERR1163854</b> | <b>XXVIII</b>        |                                                                 |            |          |                            |  |
| group_6190                    | epsJ_1               | putative glycosyltransferase EpsJ                               | 4066       | 91       | 76                         |  |
| group_6191                    |                      | hypothetical protein                                            | 4067       | N/A      | N/A                        |  |
| group_4660                    | epsJ_2               | putative glycosyltransferase EpsJ                               | 4068       | 97       | 80                         |  |
| tagE                          |                      | putative poly(glycerol-phosphate) alpha-glycosyltransferase     | 4124       | N/A      | N/A                        |  |
| group_8755                    | epsJ_3               | putative glycosyltransferase EpsJ                               | 4125       | 40       | 83                         |  |

|            |       |                                         |      |     |     |
|------------|-------|-----------------------------------------|------|-----|-----|
| group_2110 |       | hypothetical protein                    | 4126 | N/A | N/A |
| group_3997 | cstVI | GT-42 glycosyltransferase               | 4127 | N/A | N/A |
| group_2770 | siaA  | UDP-N-acetylglucosamine 2-epimerase     | 4014 |     |     |
| legI_1     |       | N,N'-diacetyllegionaminic acid synthase | 4155 |     |     |
| group_4658 | cstI  | hypothetical protein                    | 4157 |     |     |

| <b>Group 7</b>                                        |                      |                                         |            |           |                            |
|-------------------------------------------------------|----------------------|-----------------------------------------|------------|-----------|----------------------------|
| Gene                                                  | Non-unique Gene name | Annotation                              | Orthologue | coverage  | %nt id to <i>C. jejuni</i> |
| <b>ERR1163758</b>                                     | <b>II</b>            |                                         |            |           |                            |
| group_7713                                            | epsJ_1               | putative glycosyltransferase EpsJ       | 4201       | N/A       | N/A                        |
| group_7712                                            |                      | hypothetical protein                    | 4208       | N/A       | N/A                        |
| group_2667                                            |                      | hypothetical protein                    | 4209       | N/A       | N/A                        |
| group_6160                                            | cstIV                | GT-42 glycosyltransferase               | 4210       | N/A       | N/A                        |
| group_7711                                            |                      | hypothetical protein                    | 4202       | N/A       | N/A                        |
| cptA                                                  |                      | Phosphoethanolamine transferase CptA    | 4203       | N/A       | N/A                        |
| group_7710                                            |                      | hypothetical protein                    | 4204       | N/A       | N/A                        |
| group_4620                                            |                      | hypothetical protein                    | 4205       | N/A       | N/A                        |
| group_6063                                            |                      | hypothetical protein                    | 4206       | N/A       | N/A                        |
| group_3722                                            |                      | hypothetical protein                    | 4207       | N/A       | N/A                        |
| group_4658                                            |                      | hypothetical protein                    | 4157       |           |                            |
| group_7183                                            | neuA                 | N-acylneuraminate cytidyltransferase    | 4156       |           |                            |
| legI_1                                                |                      | N,N'-diacetyllegionaminic acid synthase | 4155       |           |                            |
| group_2770                                            | siaA                 | UDP-N-acetylglucosamine 2-epimerase     | 4014       |           |                            |
| <b>ERR1163726</b>                                     | <b>XXIX</b>          |                                         |            |           |                            |
| group_5303                                            | epsJ_1               | putative glycosyltransferase EpsJ       | 4060       | 67        | 76                         |
| group_4659                                            |                      | hypothetical protein                    | 4061       | N/A       | N/A                        |
| group_8389                                            |                      | hypothetical protein                    | 4083       | N/A       | N/A                        |
| group_6184                                            | cstIV                | GT-42 glycosyltransferase               | 4063       | N/A       | N/A                        |
| eptC                                                  |                      | Phosphoethanolamine transferase EptC    | 4084       | N/A       | N/A                        |
| group_2770                                            | siaA                 | UDP-N-acetylglucosamine 2-epimerase     | 4014       |           |                            |
| legI_1                                                |                      | N,N'-diacetyllegionaminic acid synthase | 4155       |           |                            |
| group_4585                                            | neuA                 | N-acylneuraminate cytidyltransferase    | 4146       |           |                            |
| <b>ERR1163788, SRR1975124, ERR1163731, SRR3214492</b> |                      |                                         |            | <b>30</b> |                            |
| group_5303                                            | epsJ_1               | putative glycosyltransferase EpsJ       | 4060       | 67        | 76                         |
| group_4659                                            |                      | hypothetical protein                    | 4061       | N/A       | N/A                        |
| group_2671                                            |                      | hypothetical protein                    | 4062       | N/A       | N/A                        |

|                                  |        |                                                       |      |     |     |
|----------------------------------|--------|-------------------------------------------------------|------|-----|-----|
| group_6184                       | cstIV  | GT-42 glycosyltransferase                             | 4063 | N/A | N/A |
| eptC                             |        | Phosphoethanolamine transferase EptC                  | 4084 | N/A | N/A |
| <b>ERR1163754</b>                |        | <b>XXXI</b>                                           |      |     |     |
| group_8560                       | epsJ_1 | putative glycosyltransferase EpsJ                     | 4101 | 91  | 77  |
| group_4659                       |        | hypothetical protein                                  | 4061 | N/A | N/A |
| group_2671                       |        | hypothetical protein                                  | 4062 | N/A | N/A |
| group_6184                       | cstIV  | GT-42 glycosyltransferase                             | 4063 | N/A | N/A |
| eptC                             |        | Phosphoethanolamine transferase EptC                  | 4084 | N/A | N/A |
| group_2770                       | siaA   | UDP-N-acetylglucosamine 2-epimerase                   | 4014 |     |     |
| legI_1                           |        | N,N'-diacetyllegionaminic acid synthase               | 4155 |     |     |
| group_4658                       |        | hypothetical protein                                  | 4157 |     |     |
| group_5314                       | neuA   | N-acylneuraminate cytidyltransferase                  | 4131 |     |     |
| <b>ERR1163708 and SRR3214482</b> |        | <b>XXXII</b>                                          |      |     |     |
| group_5303                       | epsJ_1 | putative glycosyltransferase EpsJ                     | 4060 | 67  | 76  |
| group_4659                       |        | hypothetical protein                                  | 4061 | N/A | N/A |
| group_2671                       |        | hypothetical protein                                  | 4062 | N/A | N/A |
| group_6184                       | cstIV  | GT-42 glycosyltransferase                             | 4063 | N/A | N/A |
| pssM                             |        | Exopolysaccharide glucosyl ketal-pyruvate-transferase | 4064 | N/A | N/A |
| group_8235                       |        | hypothetical protein                                  | 4065 | 43  | 81  |
| <b>ERR1163818, ERR1163835</b>    |        | <b>XXXIII</b>                                         |      |     |     |
| group_5303                       | epsJ_1 | putative glycosyltransferase EpsJ                     | 4060 | 67  | 76  |
| group_4659                       |        | hypothetical protein                                  | 4061 | N/A | N/A |
| group_2671                       |        | hypothetical protein                                  | 4062 | N/A | N/A |
| group_6184                       | cstIV  | GT-42 glycosyltransferase                             | 4063 | N/A | N/A |
| eptC                             |        | Phosphoethanolamine transferase EptC                  | 4084 | N/A | N/A |
| pssM                             |        | Exopolysaccharide glucosyl ketal-pyruvate-transferase | 4064 | N/A | N/A |
| group_8235                       |        | hypothetical protein                                  | 4065 | 43  | 81  |
| <b>SRR1975129</b>                |        | <b>XXXIV</b>                                          |      |     |     |
| group_5303                       | epsJ_1 | putative glycosyltransferase EpsJ                     | 4060 | 67  | 76  |
| group_4659                       |        | hypothetical protein                                  | 4061 | N/A | N/A |
| group_2671                       |        | hypothetical protein                                  | 4062 | N/A | N/A |
| group_6184                       | cstIV  | GT-42 glycosyltransferase                             | 4063 | N/A | N/A |
| eptC                             |        | Phosphoethanolamine transferase EptC                  | 4084 | N/A | N/A |
| eptC_2                           |        | Phosphoethanolamine transferase EptC                  | 4176 | N/A | N/A |
| group_9399                       |        | hypothetical protein                                  | 4177 | N/A | N/A |

|                   |             |                                                                  |      |     |     |
|-------------------|-------------|------------------------------------------------------------------|------|-----|-----|
| group_2770        | siaA        | UDP-N-acetylglucosamine 2-epimerase                              | 4014 |     |     |
| legI_1            |             | N,N'-diacetyllegionaminic acid synthase                          | 4155 |     |     |
| <b>ERR1163785</b> | <b>XXXV</b> |                                                                  |      |     |     |
| group_8590        | epsJ_2      | putative glycosyltransferase EpsJ                                | 4105 | 66  | 76  |
| group_6243        |             | hypothetical protein                                             | 4106 | N/A | N/A |
| group_6244        |             | hypothetical protein                                             | 4107 | N/A | N/A |
| group_8591        | cstIV       | GT-42 glycosyltransferase                                        | 4108 | N/A | N/A |
| eptC_1            |             | Phosphoethanolamine transferase EptC                             | 4109 | N/A | N/A |
| group_8593        | eptC_2      | Phosphoethanolamine transferase EptC                             | 4110 | N/A | N/A |
| group_4522        | fdtB        | dTDP-3-amino-3,6-dideoxy-alpha-D-galactopyranose transaminase    | 4018 | N/A | N/A |
| group_8594        | wfgD        | UDP-Glc:alpha-D-GlcNAc-diphosphoundecaprenol beta-1,3-glucosyltr | 4111 | N/A | N/A |
| group_8595        |             | hypothetical protein                                             | 4112 | N/A | N/A |
| group_8596        | epsE        | Putative glycosyltransferase EpsE                                | 4113 | N/A | N/A |
| group_6229        |             | hypothetical protein                                             | 4097 | N/A | N/A |
| group_8529        | lacA_1      | Galactoside O-acetyltransferase                                  | 4098 | N/A | N/A |
| fdtA              |             | TDP-4-oxo-6-deoxy-alpha-D-glucose-3,4-oxoisomerase               | 4078 | N/A | N/A |
| oatWY             |             | Polysialic acid O-acetyltransferase                              | 4077 | N/A | N/A |
| rfbB              |             | dTDP-glucose 4,6-dehydratase                                     | 4026 | N/A | N/A |
| rmlA              |             | Glucose-1-phosphate thymidyltransferase                          | 4027 | N/A | N/A |

**Supplementary Table 6**

| Genome<br>(Acc.<br>Number) | MLST<br>Sequence<br>type | ReMatCh<br>results for<br>GT-42 |
|----------------------------|--------------------------|---------------------------------|
| ERR221394                  | 19                       | <i>cstIV</i>                    |
| ERR221300                  | 48                       | <i>cstIV</i>                    |
| SRR5170912                 | 459                      | <i>cstIV</i>                    |
| SRR2976823                 | 459                      | <i>cstIV</i>                    |
| SRR3583303                 | 459                      | <i>cstIV</i>                    |
| SRR4018132                 | 459                      | <i>cstIV</i>                    |
| SRR2727977                 | 459                      | <i>cstIV</i>                    |
| SRR3066579                 | 459                      | <i>cstIV</i>                    |
| SRR5808785                 | 459                      | <i>cstIV</i>                    |
| SRR5821279                 | 459                      | <i>cstIV</i>                    |
| SRR3953110                 | 459                      | <i>cstIV</i>                    |
| SRR3611765                 | 459                      | <i>cstIV</i>                    |
| SRR5297422                 | 459                      | <i>cstIV</i>                    |
| SRR5209908                 | 459                      | <i>cstIV</i>                    |
| SRR3543495                 | 459                      | <i>cstIV</i>                    |
| ERR1906140                 | 1286                     | <i>cstIV</i>                    |
| ERR1906133                 | 1286                     | <i>cstIV</i>                    |
| ERR1906188                 | 1316                     | <i>cstIV</i>                    |
| ERR226168                  | 2568                     | <i>cstIV</i>                    |
| ERR152270                  | 2568                     | <i>cstIV</i>                    |
| SRR3402101                 | 4486                     | <i>cstIV</i>                    |
| ERR349076                  | 6564                     | <i>cstIV</i>                    |
| ERR349092                  | 7278                     | <i>cstIV</i>                    |
| ERR1025561                 | 7546                     | <i>cstIV</i>                    |
| SRR5230154                 | -                        | <i>cstIV</i>                    |
| SRR5297186                 | -                        | <i>cstIV</i>                    |
| SRR4175504                 | -                        | <i>cstIV</i>                    |
| SRR4022328                 | -                        | <i>cstIV</i>                    |
| SRR5222006                 | -                        | <i>cstIV</i>                    |
| ERR349072                  | -                        | <i>cstIV</i>                    |
| SRR4022329                 | -                        | <i>cstIV</i>                    |
| SRR3196134                 | -                        | <i>cstIV</i>                    |
| SRR3490037                 | -                        | <i>cstIV</i>                    |
| ERR222680                  | -                        | <i>cstIV</i>                    |
| SRR3619952                 | -                        | <i>cstIV</i>                    |
| ERR349126                  | -                        | <i>cstIV</i>                    |
| SRR3490036                 | -                        | <i>cstIV</i>                    |
| SRR3882939                 | -                        | <i>cstIV</i>                    |
| SRR5925242                 | -                        | <i>cstIV</i>                    |
| ERR355978                  | -                        | <i>cstIV</i>                    |
| ERR196590                  | 19                       | <i>cstVI</i>                    |
| ERR211364                  | 21                       | <i>cstVI</i>                    |
| ERR152288                  | 45                       | <i>cstVI</i>                    |
| ERR196398                  | 61                       | <i>cstVI</i>                    |
| ERR196702                  | 1044                     | <i>cstVI</i>                    |
| ERR152190                  | 2568                     | <i>cstVI</i>                    |
| ERR128771                  | -                        | <i>cstVI</i>                    |
| ERR211196                  | -                        | <i>cstVI</i>                    |
| ERR211199                  | -                        | <i>cstVI</i>                    |
| ERR193035                  | -                        | <i>cstVI</i>                    |
| ERR084058                  | 3029                     | <i>cstVII</i>                   |
| ERR1815190                 | -                        | <i>cstVII</i>                   |



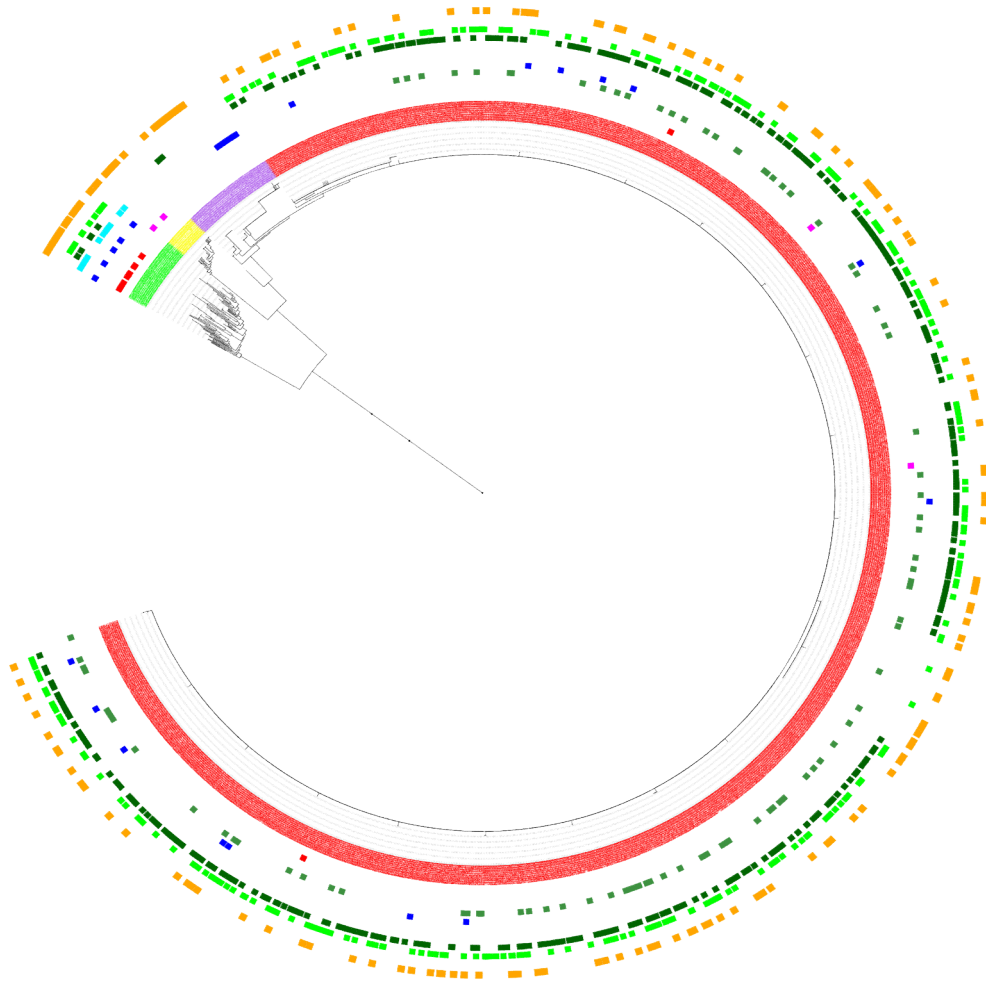

Figure S1. Evolutionary analyses of 2553 *C. coli* strains based on *atpA* conducted in MEGA7 and the evolutionary history was inferred using the Minimum Evolution method calculating the distance using Maximum Composite Likelihood. Colour of the leaf correspond of the *C. coli* clades as defined by Sheppard and colleagues<sup>1</sup>, and inferred using hierBAPS2: Clade 1a, red; Clade 1b and 1c, violet; Clade 2, yellow; Clade 3, green. Circles from in to out, positive ReMatCh results for: GT42 Group 1 (cstI), red; GT42 Group 2 (cstIII), pink; GT42 Group 3 (cstVII), turquoise; GT42 Group 4 (cstII), blue; GT42 Group 5 (cstV), cyan; GT42 Group 6 (cstVI), green; GT42 Group 7 (cstIV), light green; neuB, orange.

#### REFERENCES

- 1 Sheppard, S. K. *et al.* Progressive genome-wide introgression in agricultural *Campylobacter coli*. *Mol. Ecol.* **22**, 1051–1064 (2013).
- 2 Cheng, L., Connor, T. R., Sirén, J., Aanensen, D. M. & Corander, J. Hierarchical and Spatially Explicit Clustering of DNA Sequences with BAPS Software. *Mol. Biol. Evol.* **30**, 1224–1228 (2013).
